# Supplementary material for: P and N type copper phthalocyanines as effective semiconductors in organic thin-film transistor based DNA biosensors at elevated temperatures
Source: Royal Society of Chemistry journal article supplement (doi:10.1039/c8ra08829b), 2019-01-01
Supplement: c8ra08829b1.pdf [file c8ra08829b1.pdf]

**P and N type copper phthalocyanines as effective semiconductors in organic thin-film transistor based DNA biosensors at elevated temperature**

*Nicholas T. Boileau, Owen A. Melville, Brendan Mirka, Rosemary Cranston, Benoit H. Lessard\**

University of Ottawa, Department of Chemical and Biological Engineering

161 Louis Pasteur, Ottawa, Ontario, K1N 6N5

\*Corresponding Author. E-mail: benoit.lessard@uottawa.ca

Supplementary Information

Figures S1 and S2 display the electronic data for CuPc and F16-CuPc devices deposited at  $T = 25\text{ }^{\circ}\text{C}$ . These devices were tested identically to those deposited at  $T = 140\text{ }^{\circ}\text{C}$ .

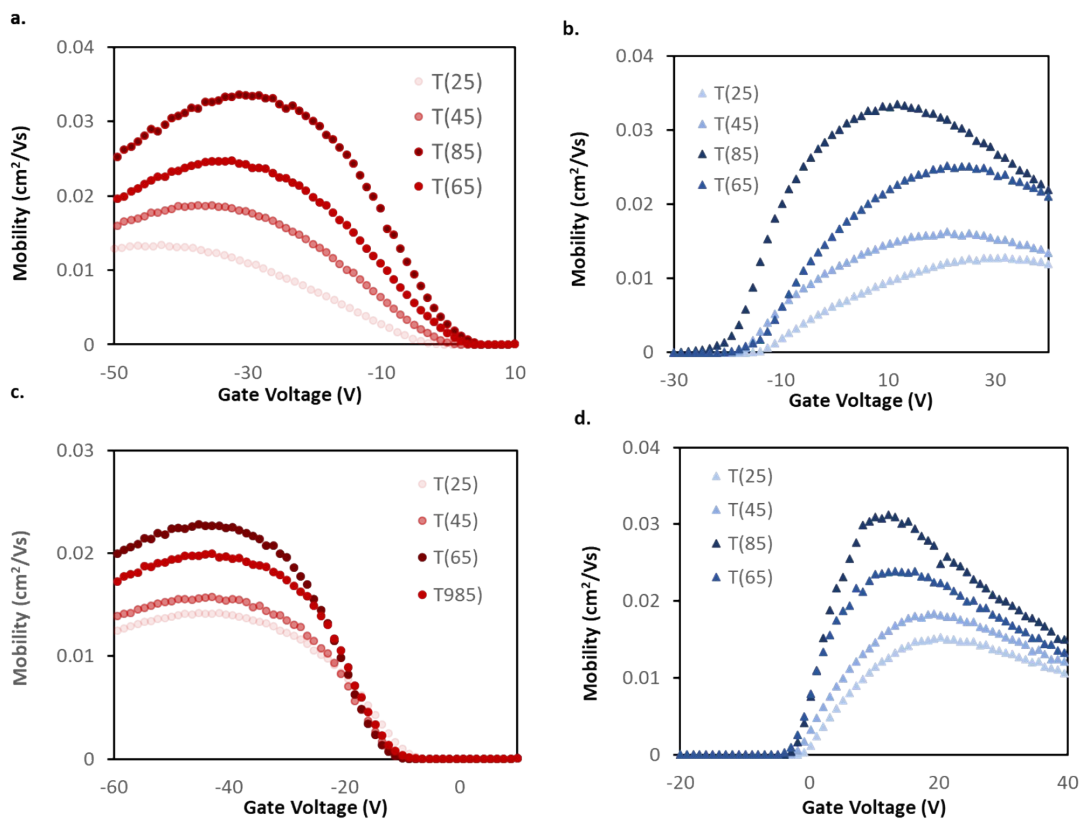

Figure S1. Field-effect mobility for (a,c) CuPc and (b,d) F16-CuPc devices deposited at  $T = 25\text{ }^{\circ}\text{C}$  with respect to applied gate-source voltage ( $V_{\text{GS}}$ ) for characteristic devices at varied temperatures in air (a, b) and vacuum (c, d). This mobility was calculated between adjacent points in the transfer data using equation 2

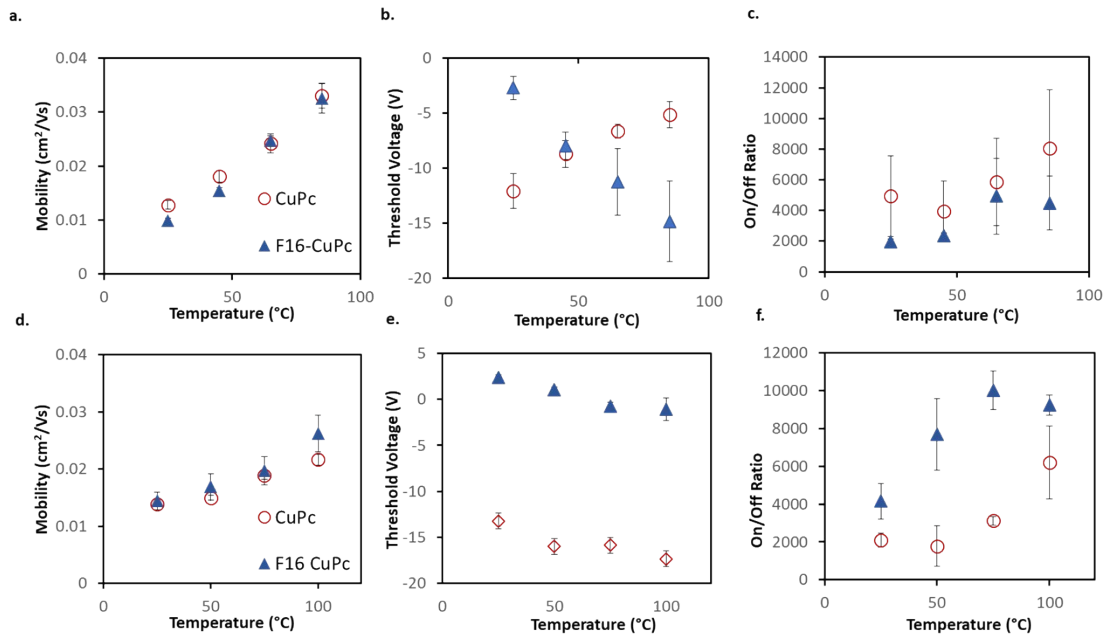

Figure S2. Performance of CuPc and F<sub>16</sub>-CuPc devices (deposited at T = 140 °C) in air at various temperatures. (a) Field-effect mobility. (b) Threshold voltage (V<sub>T</sub>). (c) on/off ratio. Presented are the averages for four devices with error bars representing the standard deviation. The legend in (a) is the same as in (b) and (c).
